# Supplementary material
Source: Springer Nature journal article supplement (https://www.springermedizin.de/resource/supplementary/12894_2005_59_MOESM5_ESM.pdf/9513898)

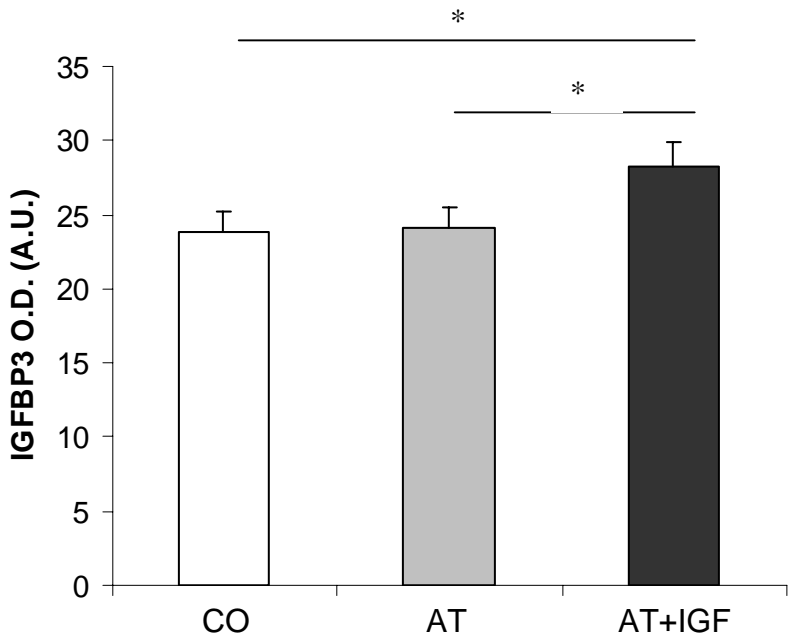

#p<0.05 AT+IGF-I vs other groups

Supplement: MOESM5 [file 9513898]
